# Supplementary material for: A Structural View of miRNA Biogenesis and Function
Source: MDPI journal article supplement (doi:10.3390/ncrna8010010), 2022-01-18
Supplement: s1 [file s1]

Conservation: 9555 599 5555555555 5 95995 99 955959599 9 5 999995959559999 95999  
AGO1 1 M---EAGPSGAAGAYLLPPLQQVFQAPRRPGITGVGKPIKLLANYFEVDIPKIDVYHYEVDIKPDKCPRR 67  
AGO4 1 M--EALGPGPP-----ASLFQPPRRPGLGTVGKPIRLLANHFQVQIPKIDVYHYDVIDIKPEKRRR 59  
AGO3 1 MEIGSAGPAGA-----QPLLMVPRRPGYGTMGKPIKLLANCFQVEIPKIDVYLYEVDIKPDKCPRR 61  
AGO2 1 M-YSGAGPALAPPAPPPPIQGYAFKPPRPDPFGTSGRTIKLQANFFEMDIPKIDIYHYELDIKPEKPRR 69  
Consensus aa: M...hGpT.s.....hhhsP.RPshGT.G+sI+LbANhFpIPKIDlyhY-LDIKP-K.PRR  
Consensus ss: hh eeeeeeeeeeee eeeeeeee hh

Conservation: 999959 995999 599999 955995 5 995 59955 95 599599959995 999955555 9  
AGO1 68 VNREVVVEYMQHFQKPIFGDRKPVYDGKKNIYTVTALPIGNERVDFEVTIPGE-GKDRIFKVSIKWLAIV 136  
AGO4 60 VNREVVDTMVRHFKMQIFGDRQPGYDGKRNMVTAHPLPIGRDRVDMEVTLPGE-GKDQTFKVSQWVSVV 128  
AGO3 62 VNREVDSMVQHFQVTIFGDRRPVYDGKRSlyTANPLPVATTGVLDVTLPGEGGKDRPFKVSIFKFSRV 131  
AGO2 70 VNREIVEHMQHFQKTIQIFGDRKPVFDGRKNLYTAMPLPIGRDKVELEVTLPGE-GKDRIFKVSIKWVSCV 138  
Consensus aa: VNRElV-.MVPHFk.pIFGDRpPs@DG++shYTh.sLPltpp.V-h-VTlPGE.GKdp.FKVSlp@lt.V  
Consensus ss: hhhhhhhhhhhhhhhhh eeeee hhheee eeeeeeee eeeeeeee ee

Conservation: 9 95559 5 59 555555555 559599 99959959999999995 5995 59999999999  
AGO1 137 SWRMLHEALVSGQIPVPLE-----SVQALDVAMRHLASMRYPVGRSFFSPPEGYHPLGGGREVWF 198  
AGO4 129 SLQLLLEALAGHLNEVPDD-----SVQALDVITRHLPSMRYPVGRSFFSPPEGYHPLGGGREVWF 190  
AGO3 132 SWHLLHEVLTGRTLPEPELDDKPISTNPVHAVDVVLRHLPSMKYTPVGRSFFSAPEGYDHPGLGGGREVWF 201  
AGO2 139 SLQALHDALSGRLPSVPFE-----TIQALDVVMRHLPSMRYPVGRSFFTASEGCSNPLGGGREVWF 200  
Consensus aa: ShphLh-hLst.....P.-.....sIpaIDVhhRHLsSM+YTPVGRSFFossEGh.p.PLGGGREVWF  
Consensus ss: ehhhhhhhh hh hhhhhhhhhh eeee ee eeeee

Conservation: 999999995595999999999999999995995959599995 59 99 5999995959999959999959  
AGO1 199 GFHQSVRPAMWKMLNIDVSATAFYKAQPVIEFMCEVLDIRNIDEQPKPLTDSQRVRFTKEIKGLKVEVT 268  
AGO4 191 GFHQSVRPAMWNMLNIDVSATAFYRAQPIIEFMCEVLDIQNIQETKPLTDSQRVKFTKEIRGLKVEVT 260  
AGO3 202 GFHQSVRPAMWKMLNIDVSATAFYKAQPVIEFMCEVLDIHNIDEQPRPLTDSHRVKFTKEIKGLKVEVT 271  
AGO2 201 GFHQSVRPSLWKMLNIDVSATAFYKAQPVIEFVCEVLDFKSIEEQKPLTDSQRVKFTKEIKGLKVEIT 270  
Consensus aa: GFHQSVRPthwPMMLNIDVSATAFY+AQpLIpFhCEVLdHpsIpeQ.+PLTDSprV+FTKEI+GLKVElT  
Consensus ss: eeeeeeee eeeeeeeeeeee hhhhhhhh hhhhhhhhhh eeeee

Conservation: 999595999999999999999999999959 995595999995 55 9595999999999999999999  
AGO1 269 HCGQMRRKYRVCNVTRRPASHQTFPLQLESGQTVECTVAQYFKQKYNLQLKYPHLPCLQVQGQEQKHTYLP 338  
AGO4 261 HCGQMRRKYRVCNVTRRPASHQTFPLQLENGQAMECTVAQYFKQKYSLQLKYPHLPCLQVQGQEQKHTYLP 330  
AGO3 272 HCGTMRRKYRVCNVTRRPASHQTFPLQLENGQTVERTVAQYFREKYTLQLKYPHLPCLQVQGQEQKHTYLP 341  
AGO2 271 HCGQMRRKYRVCNVTRRPASHQTFPLQEQSGQTVECTVAQYFKDRHKLVLRYPHLPCLQVQGQEQKHTYLP 340  
Consensus aa: HCGpM+RKYRVCNVTRRPASHQTFPLQbEsGQhE.TVAQYF+p+@pL.L+YPHLPCLQVQGQEQKHTYLP  
Consensus ss: eeee eeeee eeee hhhhhhhh eee eeee eeee

Conservation: 999999999999999999999999999959 555 55 995 9955 9 5595 5  
AGO1 339 LEVCNIVAGQRCIKKLTNDQSTMIKATARSAPDRQEEISRLMKNASY--NLDPIYIEFGIKVKDDMTEV 406  
AGO4 331 LEVCNIVAGQRCIKKLTNDQSTMIKATARSAPDRQEEISRLVKSNSMVGGDPYKLEFGIVVHNEMTEL 400  
AGO3 342 LEVCNIVAGQRCIKKLTNDQSTMIKATARSAPDRQEEISRLVRSANY--ETDPFVQEFQFKVRDEMAHV 409  
AGO2 341 LEVCNIVAGQRCIKKLTNDQSTMIKATARSAPDRQEEISKLMSASF--NTDPYVREFGIMVKDEMTDV 408  
Consensus aa: LEVCNIVAGQRCIKKLTNDQSTMI+ATARSAPDRQEEIS+Lh+sssh...DP@lpEF.h.V+s-Mhcl  
Consensus ss: eeeeee hhhhhhhhhhhh hhhhhhhhhhhh hhhhhhhh ee eeee

Conservation: 99999559 5599999 999 59999995999 959995995999959 9959 99 995999999  
AGO1 407 TGRVLPAPILQYGGRNRAIATPNQGVWDMRGKQFYNGIEIKVWAIACFAPQKQCREEVLKNFTDQLRKIS 476  
AGO4 401 TGRVLPAPMLQYGGRNKTATPNQGVWDMRGKQFYAGIEIKVWAVACFAPQKQCREDLKSFDTQLRKIS 470  
AGO3 410 TGRVLPAPMLQYGGRNRTVATPSHGVDMDRGKQFHTGVEIKMWAIACFATQRQCREEILKGFDTQLRKIS 479  
AGO2 409 TGRVLQPPSILYGGRNKAIATPVQGVWDMRNKQFHTGIEIKVWAIACFAPQRQCTEVHLKSFTQLRKIS 478  
Consensus aa: TGRVL.sP.lbYGGRN+hIATPspGVWDMRsKQF@sIeIKhWALACFAsQ+QcPe.hLKsFT-QLRKIS  
Consensus ss: eeee eeee eee eee ee eeeeee hhhhhhhhhhhhhh

Conservation: 5999999999999999999999999999599599 99995 999999999999999959999999999  
AGO1 477 KDAGMPIQGQPCFCKYAQGADSVEPMFRHLKNTYSGLQLIIVILPGKTPVYAIEVKRVGDTLLGMATQCVQ 546  
AGO4 471 KDAGMPIQGQPCFCKYAQGADSVEPMFKHLKMTYVGLQLIIVILPGKTPVYAIEVKRVGDTLLGMATQCVQ 540  
AGO3 480 KDAGMPIQGQPCFCKYAQGADSVEPMFRHLKNTYSGLQLIIVILPGKTPVYAIEVKRVGDTLLGMATQCVQ 549  
AGO2 479 RDAGMPIQGQPCFCKYAQGADSVEPMFRHLKNTYAGLQLVVVILPGKTPVYAIEVKRVGDTVLGMATQCVQ 548  
Consensus aa: +DAGMPIQGQPCFCKYAQGADSVEPMF+HLK.TYsGLQLlLVILPGKTPVYAIEVKRVGDTlLGMATQCVQ  
Consensus ss: hh eeee hhhhhhhhhhhhhh eeeeee hhhhhhhhhh eeeee
