# Supplementary figures and images for: A Structural View of miRNA Biogenesis and Function
Source: MDPI journal article supplement (doi:10.3390/ncrna8010010), 2022-01-18

**a**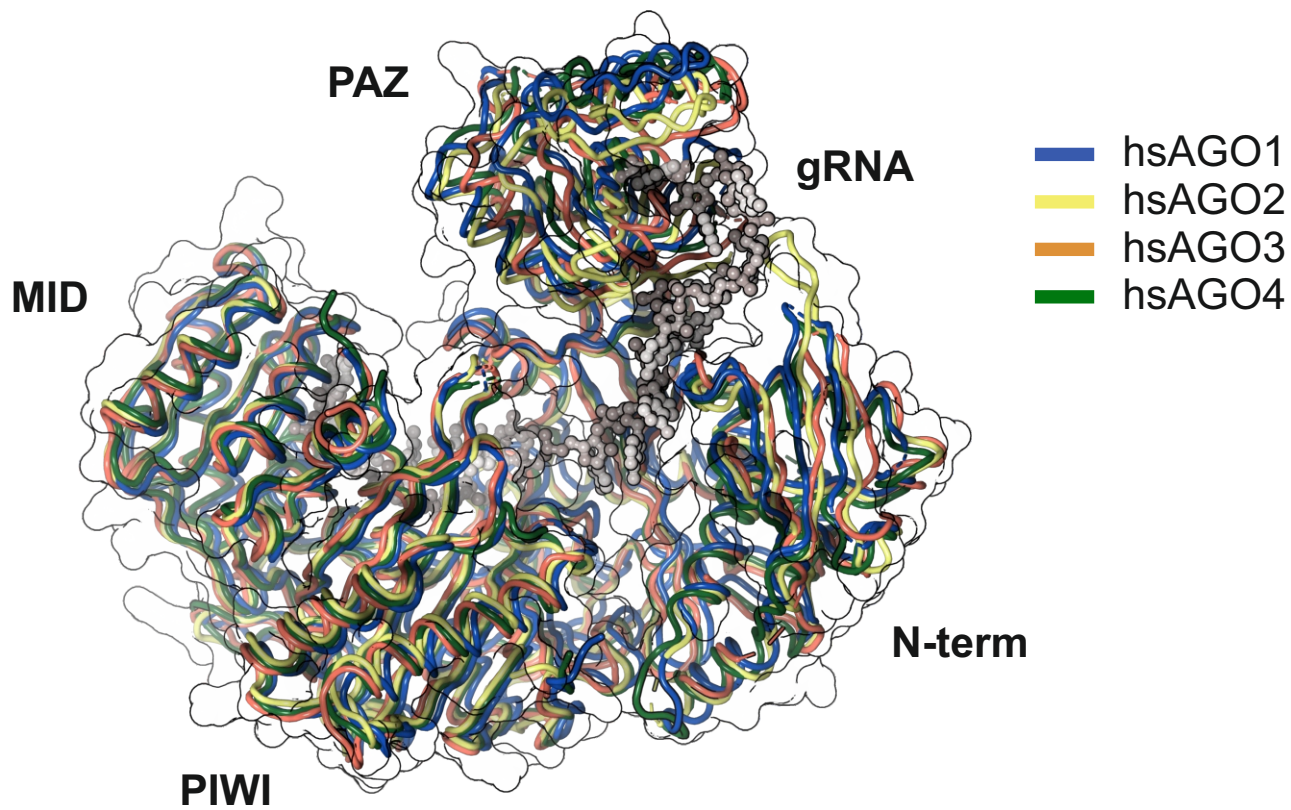**b**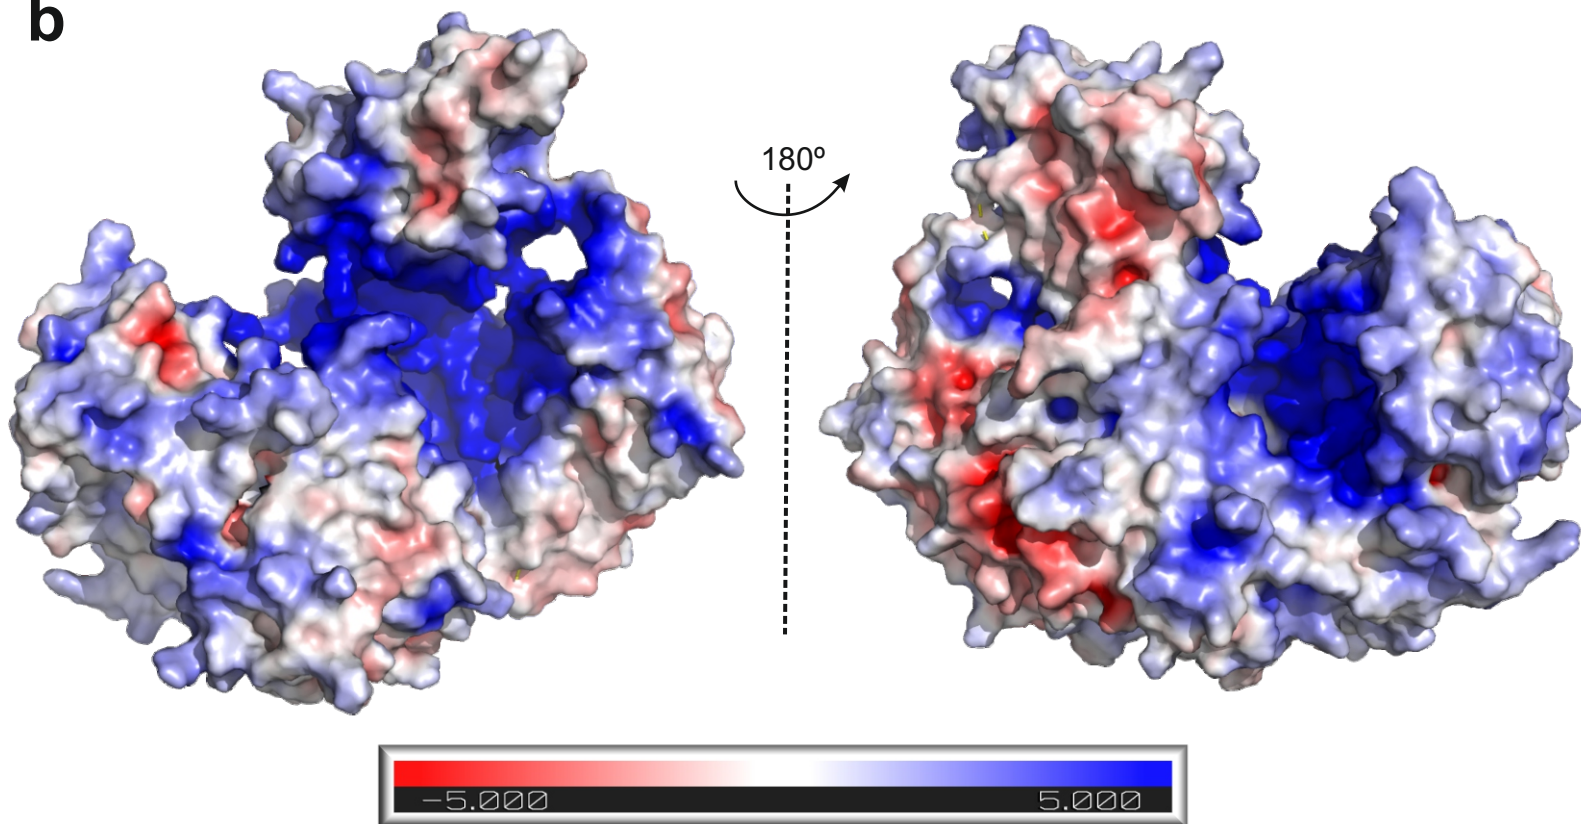

Supplement: s1 [file s1]
